# Supplementary material for: Oral Supplementation with Sucrosomial Ferric Pyrophosphate Plus L-Ascorbic Acid to Ameliorate the Martial Status: A Randomized Controlled Trial
Source: Nutrients. 2020 Jan 31;12(2):386. doi: 10.3390/nu12020386 (PMC7071340; doi:10.3390/nu12020386)
Supplement: Supplementary File 1 [file nutrients-12-00386-s001.xlsx]

## Sheet: Manuscript data - SPSS
ID faldone	Group	Age at pre-ricovero	Gender	Intervention	Hb (T0)	Hb (T1)	Δ Hb	Δ % Hb	Hb (G0)	RBCs (T0)	RBCs (T1)	RBCs (G0)	MCV (T0)	MCV (T1)	MCV (G0)	MCH (T0)	MCH (T1)	MCH (G0)	MCHC (T0)	MCHC (T1)	MCHC (G0)	Iron (T0)	Iron (T1)	Δ Iron	Δ % Iron	Transferrin (T0)	Transferrin (T1)	Ferritin (T0)	Ferritin (T1)	TIBC (T0)	TIBC (T1)
13B	0	49	0	anca dx	16.4	15.5	-0.9	-5.4878	14.2	5.4	5.1	4.7	88.3	87.3	85.6	30.5	30.7	30	34.5	35.1	35.1	99	114	15	15.1515	257	242	282	235	27	33
23B	0	49	0	anca dx	14.7	15.1	0.4	2.72109	13.4	5.1	5.4	4.8	85.7	83.5	84.5	28.9	28.1	28.1	33.7	33.6	33.3	52	63	11	21.1538	242	239	80	96	15	18
32B	0	57	0	anca dx	14.2	14.4	0.2	1.40845	13.4	5	5	4.6	86.3	85.7	86.4	28.6	29	28.9	33.1	33.9	33.4	77	66	-11	-14.2857	283	298	23	18	19	15
60B	0	57	0	anca dx	14.9	15.4	0.5	3.3557	13.1	4.8	4.8	4.2	91.6	92.4	92.4	31.2	31.8	31	34	34.5	33.5	67	87	20	29.8507	216	248	279	382	21	24
01B	0	58	0	ginocchio sx	15.8	15.4	-0.4	-2.53165	15.6	5.2	5.2	5.2	92.7	92.2	89.6	30.3	29.9	29.9	32.7	32.4	33.4	83	112	29	34.9398	259	261	572	659	22	30
24B	0	59	0	ginocchio sx	15.9	15.9	0	0	13.1	5.2	5.3	4.4	86.7	86.4	88	30.8	30.1	30.1	35.5	34.9	34.2	150	154	4	2.66667	225	225	127	153	46	48
44B	0	59	0	ginocchio sx	15.6	15.9	0.3	1.92308	14.9	5.2	5.2	4.9	87.8	86.3	87.4	30.3	30.7	30.2	34.5	35.6	34.6	52	81	29	55.7692	300	291	99	106	12	19
04B	0	61	0	ginocchio sx	16.1	15.9	-0.2	-1.24224	14.6	5.4	5.3	4.8	89.5	86.5	88.7	30.1	29.8	30.5	33.6	34.5	34.4	82	126	44	53.6585	254	260	482	698	22	34
50B	0	63	0	ginocchio dx	14.1	15.2	1.1	7.80142	12.7	4.6	4.9	4.1	91.2	91	89.1	31	40	30.8	34	34.2	34.5	74	106	32	43.2432	353	349	332	400	14	21
47B	0	64	0	anca dx	16	15.9	-0.1	-0.625	13.6	5	5	4.3	92.6	93.4	93.1	31.9	31.4	31.5	34.5	33.8	33.8	32	106	74	231.25	227	238	169	160	9	31
02B	0	65	0	anca dx	16.2	15.1	-1.1	-6.79012	12.3	4.8	4.5	3.7	97.7	95.8	96.2	33.5	33.3	33.5	34.2	34.7	34.8	95	118	23	24.2105	189	188	299	334	35	44
15B	0	66	0	ginocchio sx	14.2	14.7	0.5	3.52113	12.5	4.8	5	4.3	90	87.8	89.5	29.5	29.4	29.2	32.8	33.5	32.6	72	98	26	36.1111	281	294	131	103	18	23
35B	0	66	0	anca sx	15.5	15.5	0	0	14	5.2	5.1	4.7	88.2	88	88.8	30	30.5	29.5	34.1	34.7	33.3	91	98	7	7.69231	235	235	192	204	27	29
07B	0	67	0	ginocchio dx	15	13.6	-1.4	-9.33333	13.9	4.9	4.4	4.7	92.8	93.2	91.8	30.7	31.1	29.9	33.1	33.3	32.6	73	110	37	50.6849	249	223	167	193	20	34
59B	0	75	0	ginocchio dx	14	14	0	0	12.5	4.6	4.6	4.1	89.5	90.4	88.8	30.6	30.6	30.6	34.1	33.8	34.4	74	78	4	5.40541	285	230	189	193	22	23
11A	1	52	0	ginocchio sx	17	15.6	-1.4	-8.23529	14.1	5.4	4.9	4.6	88.8	90	89.3	31.6	31.8	30.7	35.6	35.4	34.4	75	128	53	70.6667	232	221	284	292	22	40
14A	1	57	0	anca sx	16	15.6	-0.4	-2.5	14.4	5.4	5.4	4.9	89	87.1	87.8	29.4	29.2	29.4	33.1	33.5	33.5	76	63	-13	-17.1053	249	231	591	575	21	19
57A	1	57	0	anca sx	14.3	14.3	0	0	13.5	4.6	4.6	4.4	94.1	94.1	91.3	31.2	31	31	33.1	32.9	33.9	64	97	33	51.5625	236	246	118	135	19	27
43A	1	63	0	anca dx	14.1	14.6	0.5	3.5461	13	4.9	4.9	4.4	80.9	83.1	82.8	28.7	28.8	29.4	35.5	35.9	35.5	54	101	47	87.037	218	228	125	131	17	31
45A	1	63	0	anca sx	16	15.7	-0.3	-1.875	14.7	5.3	5.2	4.8	88.3	86.1	87.3	30.1	30.3	30.6	34.1	35.1	35.1	104	110	6	5.76923	250	233	318	312	29	33
31A	1	68	0	anca sx	16.6	15.5	-1.1	-6.62651	13	5.46	5.2	4.3	92.1	91.5	94.4	30.4	30.1	30.6	33	32.9	32.4	82	112	30	36.5854	267	248	264	273	21	31
10A	1	69	0	anca dx	16.2	16.6	0.4	2.46914	12.8	5.2	5.2	4.2	92.2	90.6	88.1	31	31.9	30.5	33.6	37	34.7	78	130	52	66.6667	245	246	199	273	22	37
33A	1	70	0	anca dx	14.8	14.2	-0.6	-4.05405	13	4.4	4.3	3.9	100	99.8	100	33.3	33.3	33.1	33.3	33.3	33.1	195	185	-10	-5.12821	157	153	1263	1394	87	85
72A	1	70	0	anca sx	14.3	14.8	0.5	3.4965	12.9	4.6	4.3	4.1	92.9	90.4	92.5	30.9	30.9	31.2	33.3	34.2	33.7	83	101	18	21.6867	222	238	425	409	26	29
41A	1	71	0	anca dx	11.7	11.6	-0.1	-0.854701	9.7	3.9	3.9	3.2	90.3	91.5	91.9	29.8	29.8	30.3	33.1	32.6	33	62	73	11	17.7419	253	248	74	67	17	20
76A	1	72	0	ginocchio dx	14.6	14.1	-0.5	-3.42466	13.5	4.8	4.6	4.4	88.8	87.9	89.1	30.7	30.5	30.6	34.6	34.7	34.4	65	94	29	44.6154	228	227	54	94	20	29
82A	1	72	0	anca sx	14.5	14.6	0.1	0.689655	12.2	5.1	5.1	4.3	81.8	84.2	82.3	28.4	28.5	28.4	34.7	33.8	34.6	92	85	-7	-7.6087	254	260	138	121	25	23
65A	1	73	0	anca sx	14.1	14.5	0.4	2.83688	12	4.7	4.9	4.1	91.2	91.2	92.9	29.7	29.6	29.2	32.6	32.4	31.4	61	95	34	55.7377	230	257	178	149	18	26
80A	1	74	0	anca dx	16.2	16.6	0.4	2.46914	13.5	5.4	5.4	4.5	84.4	87.3	86.1	28.8	30.6	29.9	35.3	35	34.7	119	122	3	2.52101	227	221	350	384	36	38
20A	1	79	0	anca dx	11.7	11.3	-0.4	-3.4188	11.4	3.8	3.6	3.7	92.6	92.6	92.5	30.9	31	30.7	33.3	33.5	33.2	81	91	10	12.3457	253	260	60	72	22	24
17B	0	59	1	ginocchio sx	13.1	13.8	0.7	5.34351	11.8	4.6	4.9	4.1	84.7	82.4	83.9	28.3	28	28.4	33.4	34	33.9	93	77	-16	-17.2043	274	283	159	146	23	19
55B	0	59	1	anca dx	13.1	14	0.9	6.87023	12.1	4.7	5.1	4.4	86.1	81.4	82.7	28.1	27.4	27.3	32.6	33.7	33	65	93	28	43.0769	340	335	13	12	13	19
12B	0	64	1	anca sx	15.5	15.7	0.2	1.29032	14.1	5.2	5.1	4.7	89.6	88.9	89.4	29.8	30.6	29.9	33.2	34.4	33.5	83	76	-7	-8.43373	330	347	80	54	17	15
03B	0	66	1	ginocchio dx	12.2	11.2	-1	-8.19672	9.7	5.7	5.1	4.6	69.4	68.6	68.8	21.4	21.9	21	30.8	31.9	30.5	68	86	18	26.4706	234	243	82	88	20	24
08B	0	66	1	ginocchio dx	13.2	13	-0.2	-1.51515	12.5	5.1	4.9	4.8	81.7	81.5	80.2	26	26.5	26	31.8	32.5	32.4	107	135	28	26.1682	277	269	49	68	27	35
29B	0	66	1	ginocchio sx	13	13.6	0.6	4.61538	12.3	4.8	5	4.4	83.3	85.2	85.1	27.1	27.3	27.7	32.6	32	32.5	37	79	42	113.514	371	357	10	14	7	15
34B	0	66	1	ginocchio sx	12.2	12.6	0.4	3.27869	11.6	4.6	4.6	4.2	86.2	86.6	88.3	26.7	27.6	27.6	31	31.9	31.3	65	73	8	12.3077	295	289	60	72	15	17
68B	0	66	1	ginocchio dx	13.1	13	-0.1	-0.763359	11.3	4.8	4.9	4.1	83.3	83.9	85.6	27.1	26.8	27.5	32.5	31.9	32.1	37	48	11	29.7297	278	279	9	9	9	12
81B	0	67	1	anca dx	13.4	13.3	-0.1	-0.746269	10.8	4.6	4.5	3.5	90.8	87.9	88.8	29.3	29.3	28.9	32.3	33.3	32.5	61	41	-20	-32.7869	263	256	120	181	16	11
18B	0	71	1	ginocchio sx	14.2	13.4	-0.8	-5.6338	12.1	4.6	4.3	4	93.3	95.1	95.4	30.5	31.2	30.6	32.6	32.8	32.1	83	87	4	4.81928	299	306	45	46	19	20
21B	0	71	1	anca sx	14.4	13.5	-0.9	-6.25	12.6	5	4.7	4.2	89.2	88.8	88.4	28.8	28.6	29.8	32.3	32.2	33.7	111	105	-6	-5.40541	293	319	48	31	26	23
28B	0	71	1	anca dx	14.4	13.7	-0.7	-4.86111	11.3	4.6	4.6	3.8	90.2	90.8	90.6	31.4	30.1	29.6	34.8	33.2	32.7	76	104	28	36.8421	262	261	81	81	20	28
06B	0	72	1	ginocchio dx	16.1	13.4	-2.7	-16.7702	14.1	5.3	4.3	4.5	89.8	88.2	90.2	30.3	30.9	31.3	33.8	35	34.6	85	58	-27	-31.7647	219	198	213	157	27	20
38B	0	72	1	ginocchio dx	14.2	13.7	-0.5	-3.52113	12.9	4.9	4.7	4.5	86.5	86.2	89	29	29.1	28.9	33.6	33.8	32.4	85	55	-30	-35.2941	257	229	288	294	23	16
66B	0	72	1	anca dx	12.9	13.5	0.6	4.65116	12	4	4.2	3.7	97.5	96.2	96.2	32.3	32.1	32.4	33.1	33.4	33.7	102	145	43	42.1569	198	227	263	287	36	44
40B	0	75	1	ginocchio sx	11.7	11.5	-0.2	-1.7094	10.9	3.8	3.7	3.5	94.2	92.7	91.7	30.9	30.9	31.2	32.8	33.3	34.1	59	47	-12	-20.339	241	225	233	276	17	14
56B	0	75	1	anca sx	13.7	13.7	0	0	11.3	5	5.1	4.2	84.9	82.8	83.5	27.5	26.7	26.7	32.4	32.2	32	59	56	-3	-5.08475	367	371	13	13	11	10
74B	0	76	1	ginocchio dx	13.6	12.5	-1.1	-8.08824	11.5	4.8	4.3	4.1	88.4	88.5	87.6	28.3	28.8	28	32	32.6	31.9	50	66	16	32	241	236	86	69	14	19
30B	0	77	1	ginocchio dx	13.6	13.4	-0.2	-1.47059	12.4	4.5	4.4	4.1	90.7	93.2	92.9	30	30.5	30.5	33	32.8	32.9	67	38	-29	-43.2836	228	209	116	150	20	12
54B	0	77	1	anca sx	13.6	13.4	-0.2	-1.47059	11.6	4.6	4.5	3.9	93	90.7	93.6	29.8	29.8	29.9	32	32.8	32	65	92	27	41.5385	221	210	201	227	20	30
75B	0	78	1	ginocchio sx	13.7	13.2	-0.5	-3.64964	12.9	4.6	4.3	4.3	91.4	94.4	93.4	30	30.9	30.3	32.9	32.8	32.4	82	130	48	58.5366	245	257	161	181	23	35
25A	1	52	1	anca sx	14.2	13.4	-0.8	-5.6338	12.4	4.8	4.7	4.3	86.5	85.6	88.2	29.5	28.8	29.2	34.1	33.6	33.1	66	62	-4	-6.06061	273	244	51	79	17	17
42A	1	53	1	ginocchio dx	12.9	13.4	0.5	3.87597	11.2	4.5	4.6	3.9	89	89.8	91.2	29	28.9	28.9	32.6	32.2	31.6	35	58	23	65.7143	203	229	102	100	12	17
09A	1	57	1	anca dx	12.4	12	-0.4	-3.22581	9	6.05	5.8	4.4	66.6	65.9	66.2	20.5	20.6	20.5	30.8	31.3	31	55	58	3	5.45455	342	344	25	23	11	11
05A	1	59	1	anca dx	14.9	12.9	-2	-13.4228	12.4	4.76	4.1	3.9	92	91.9	92.9	31.3	31.5	31.6	34	34.3	34	119	76	-43	-36.1345	246	214	114	89	34	25
69A	1	59	1	anca sx	14.4	12.9	-1.5	-10.4167	12.6	4.5	4	4	94.5	93.1	96.2	31.6	31.9	31.7	33.4	34.3	31.7	92	120	28	30.4348	295	263	100	94	21	32
53A	1	60	1	ginocchio dx	11.9	12.1	0.2	1.68067	10.2	5.3	5.3	4.4	73	73.7	75.1	22.5	23	23.1	30.7	31.3	30.7	19	22	3	15.7895	325	320	8	10	4	4
63A	1	63	1	anca sx	13	13	0	0	11	4.7	4.8	4.1	86.1	84.1	85.4	27.4	27.1	27.2	31.9	32.3	31.8	48	82	34	70.8333	289	314	19	14	11	18
73A	1	63	1	ginocchio dx	16.1	14.9	-1.2	-7.45342	14.5	5.8	5.4	5.3	86	84	84.4	27.8	27.7	27.5	32.3	33	32.6	69	59	-10	-14.4928	287	278	56	45	16	14
71A	1	64	1	anca sx	15.2	14.9	-0.3	-1.97368	14.2	5	4.8	4.7	88.2	90.2	92.1	30.4	31	30.2	34.5	34.4	32.8	78	87	9	11.5385	260	279	165	161	21	21
79A	1	64	1	ginocchio dx	14.5	14.3	-0.2	-1.37931	12.9	5.1	5.2	4.6	86.2	85.3	85.3	28.5	27.7	27.9	33.1	32.5	32.7	66	66	0	0	254	259	186	212	18	17
16A	1	71	1	anca dx	14	14.3	0.3	2.14286	12.2	5.8	6	5.1	76.1	75.1	75.1	24.1	23.8	23.7	31.6	37	31.5	82	147	65	79.2683	285	274	34	32	20	37
77A	1	72	1	ginocchio dx	13.5	13.5	0	0	12.7	4.7	4.6	4.4	86.3	88.8	88.6	28.9	29.2	28.9	33.5	32.8	32.6	84	128	44	52.381	219	236	59	53	27	38
27A	1	73	1	ginocchio sx	12.9	13	0.1	0.775194	12.1	3.99	4.1	3.8	96	95.3	95.2	32.3	31.9	32.2	33.7	33.5	33.8	71	110	39	54.9296	214	221	181	156	23	35
39A	1	73	1	anca dx	14.3	12.9	-1.4	-9.79021	10.8	4.7	4.2	3.6	93.3	91.2	91.6	30.7	30.8	30.2	32.9	33.8	32.9	68	97	29	42.6471	297	315	66	51	16	21
78A	1	74	1	anca sx	14.5	14.9	0.4	2.75862	12.4	4.9	4.9	4.1	90.5	90.4	92.7	29.9	30.3	30.1	33	33.6	32.5	90	125	35	38.8889	213	224	75	110	29	39
37A	1	75	1	anca sx	11.4	11.9	0.5	4.38596	10.6	3.9	4.2	3.7	89.2	89.9	88	29.3	28.6	28.8	31.8	31.8	32.7	22	49	27	122.727	188	210	130	75	8	16
46A	1	77	1	ginocchio dx	12.4	12.1	-0.3	-2.41935	12.2	4.8	4.6	4.6	81.1	83	83.8	26.1	26.1	26.6	32.2	31.8	31.8	41	56	15	36.5854	385	335	6	9	7	11
49A	1	77	1	ginocchio dx	9.6	10.7	1.1	11.4583	9	4	4.4	3.7	75.4	78.8	78.6	23.9	24.1	24.1	31.7	30.5	30.7	25	39	14	56	354	360	14	18	4	7
52A	1	78	1	ginocchio dx	13.5	13.3	-0.2	-1.48148	12	4.45	4.45	4	89.7	90.3	92.3	30.3	29.9	30	33.8	33.1	32.5	89	79	-10	-11.236	262	260	75	65	23	21
58A	1	78	1	anca sx	12.1	12.6	0.5	4.13223	11.5	4.3	4.4	4.2	89	86.7	86.3	28.4	28.4	27.6	31.9	32.7	31.9	44	96	52	118.182	237	230	39	48	13	29
64A	1	78	1	anca dx	14	14.4	0.4	2.85714	13	4.7	4.9	4.3	90.8	89.5	90.3	30.1	29.7	30	33.2	33.2	33.2	66	98	32	48.4848	315	317	28	28	14	21
48A	1	99	1	ginocchio dx	12.5	13.4	0.9	7.2	12.2	4.3	4.5	4.2	87.6	88.2	88.4	28.8	28.6	28.9	32.9	33.2	32.7	67	66	-1	-1.49254	268	271	50	65	17	17
